# Supplementary material for: Moderate conformational transition promotes the formation of a self-reinforced highly oriented silk fibroin network structure
Source: Royal Society of Chemistry journal article supplement (doi:10.1039/d1sm01120k), 2021-01-01
Supplement: d1sm01120k2.pdf [file d1sm01120k2.pdf]

# **Moderate conformational transition promotes the formation of a self-reinforced highly oriented silk fibroin network structure**

Ting Shu,<sup>†</sup> Jing Cui,<sup>†</sup> Zhuochen Lv, Leitao Cao, Jing Ren, and Shengjie Ling\*

School of Physical Science and Technology, ShanghaiTech University, 393 Middle Huaxia Road, Shanghai, 201210, China

The PDF file includes:

- Figure S1. Conformation transition process and deconvolution results of the amide I band of SFMs.
- Figure S2. TR-FTIR imaging of SFMs during ethanol and PEG solution penetration.
- Figure S3. Structure of MT-SFMs.
- Table S1. The number of molecules for several polyAG solution with ethanol coagulation bath.
- Table S2. The number of molecules for several polyAG solution with PEG coagulation bath.
- Table S3. The mechanical properties of WS-SFFs.
- Table S4. The mechanical properties of MT-SFMs and their control samples in dry state.
- Table S5. The mechanical properties of MT-SFMs and their control samples in wet state.

## **Other Supplementary Material for this manuscript includes the following:**

- Movie S1. The mechanical training process of SFMs under the polarized light.

## **Movie S1. The mechanical training process of SFMs under the polarized light.**

**Description:** The two ends of the rectangle SFMs was fixed on the self-made mechanical training device under two orthogonality polarizers. At first, SFMs is dull under the polarized light. Then, the birefringence fringes were appeared and gradual strengthened as the mechanical time increased. Meanwhile, the color of SFMs changed during this process, with changing from white to yellow, to purple-red and further to blue.

- Abbreviations

| Abbreviation | Full name                                   |
|--------------|---------------------------------------------|
| HOMNS        | Highly oriented molecular network structure |
| WS-SFFs      | Wet-spun silk fibroin fibers                |

|             |                                                             |
|-------------|-------------------------------------------------------------|
| SFMs        | Silk fibroin materials                                      |
| MD          | Molecular dynamic                                           |
| MT          | Mechanical training                                         |
| FA          | Formic acid                                                 |
| PEG         | Polyethylene glycol                                         |
| SFFs        | Silk fibroin fibers                                         |
| TR-FTIR     | Time-resolved Fourier transform infrared<br>spectroscopy    |
| RESP        | Restrained electrostatic potential                          |
| VMD         | Visual Molecular Dynamics                                   |
| ET-MT-SFMs  | SFMs produced by mechanical training in ethanol<br>solution |
| PEG-MT-SFMs | SFMs produced by mechanical training in PEG<br>solution     |
| ET-WS-SFFs  | SFFs produced by wet spinning in ethanol solution           |
| PEG-WS-SFFs | SFFs produced by wet spinning in PEG solution               |
| WAXS        | Wide-angle X-ray scattering                                 |
| SAXS        | Small-angle X-ray scattering                                |
| polyAG      | single Ac-(AG) <sub>6</sub> -NHMe peptide chain             |

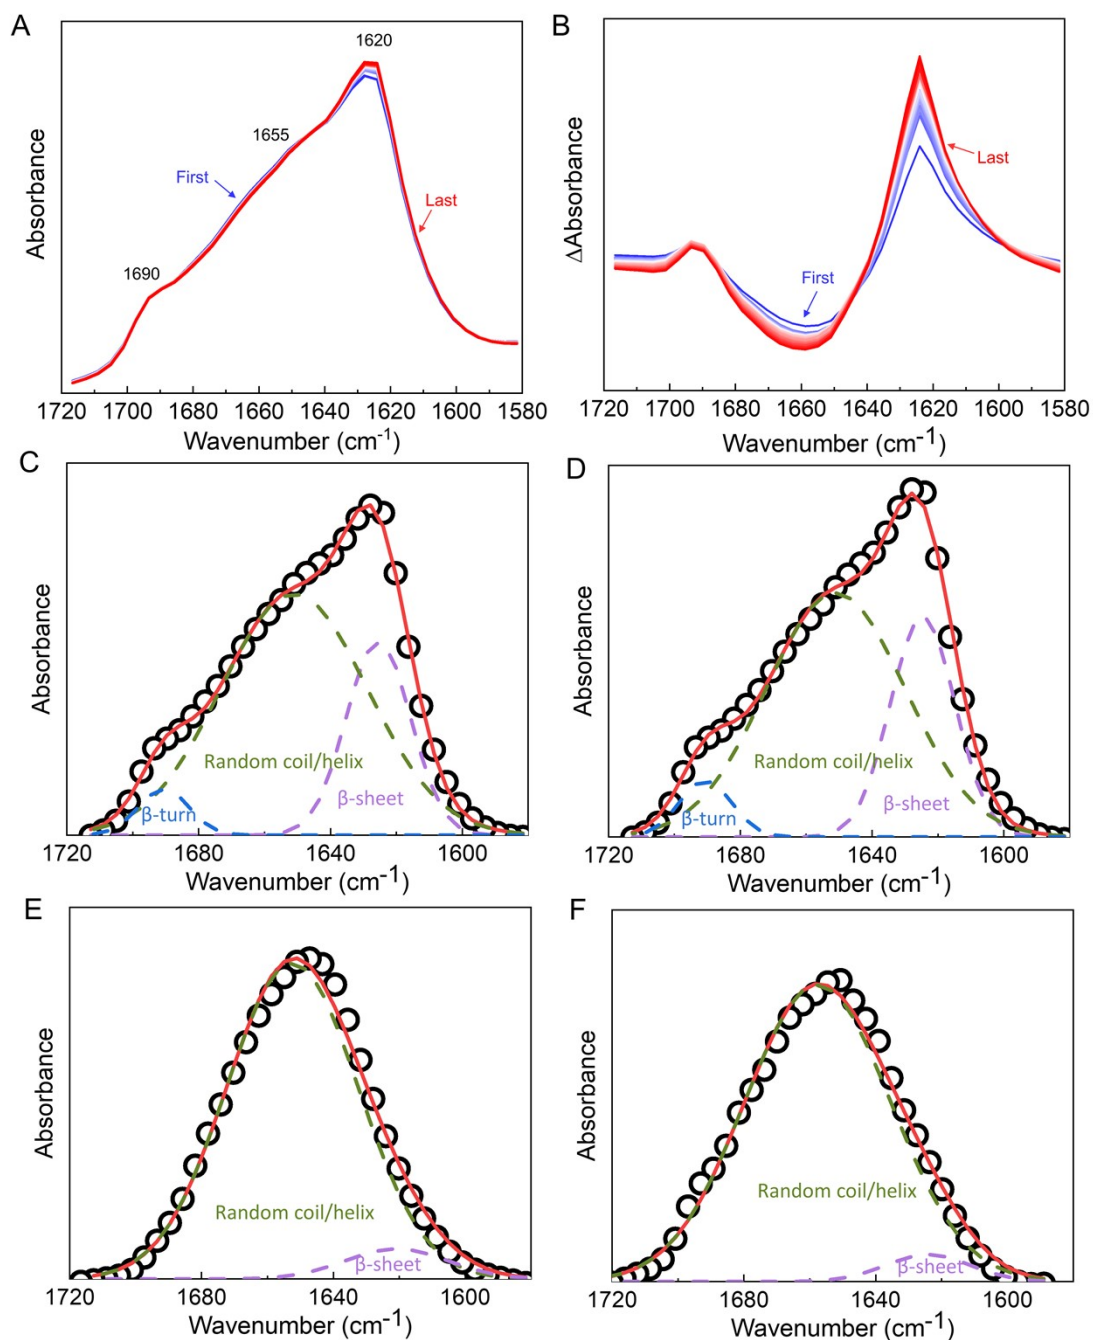

**Fig. S1.** Conformation transition and deconvolution results of the amide I band of SFMs. TR-FTIR spectra (A) and difference spectra (B) of SFMs from beginning to 30 min after the addition of 75vol% aqueous ethanol. Deconvolution results of the FTIR spectra of SFMs treated with 75vol% aqueous ethanol for 2 min (C) and 20 min (D), and treated with 20wt% aqueous PEG solution for 20 min (E). (F) Deconvolution results of the FTIR spectra of initial SFMs (dry

state).

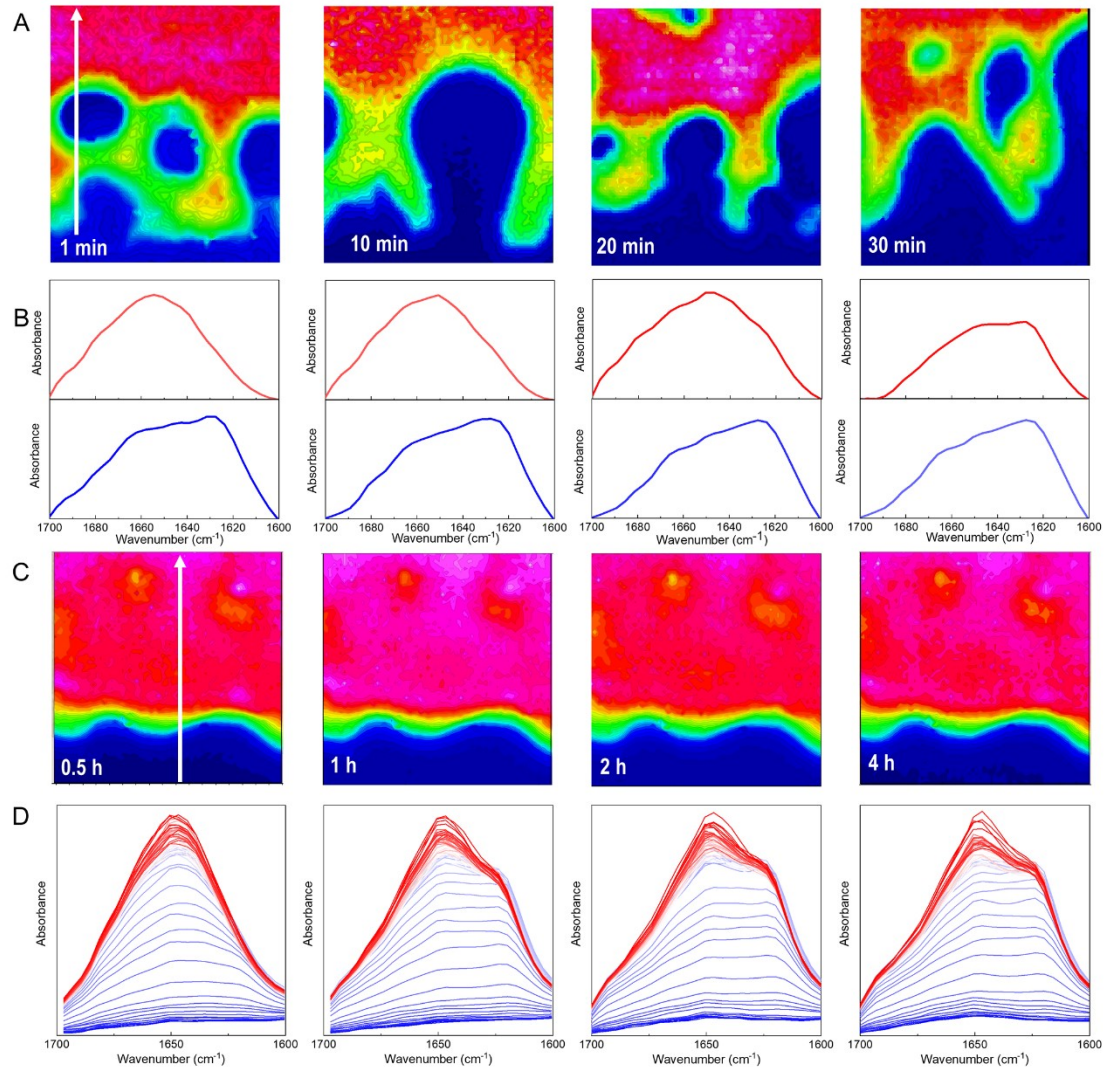

**Fig. S2.** TR-FTIR imaging of SFMs during ethanol and PEG solution penetration. Univariate imaging maps of the SFMs treated by 75 vol% aqueous ethanol solution at different times by integration of the amide I band (A) and the corresponding FTIR spectra (B). Univariate imaging maps of the SFMs treated by 20 wt% aqueous PEG solution at different times by integration of the amide I band (C) and the corresponding FTIR spectra (D). The FTIR spectra were obtained at the position of the white line in the imaging map.

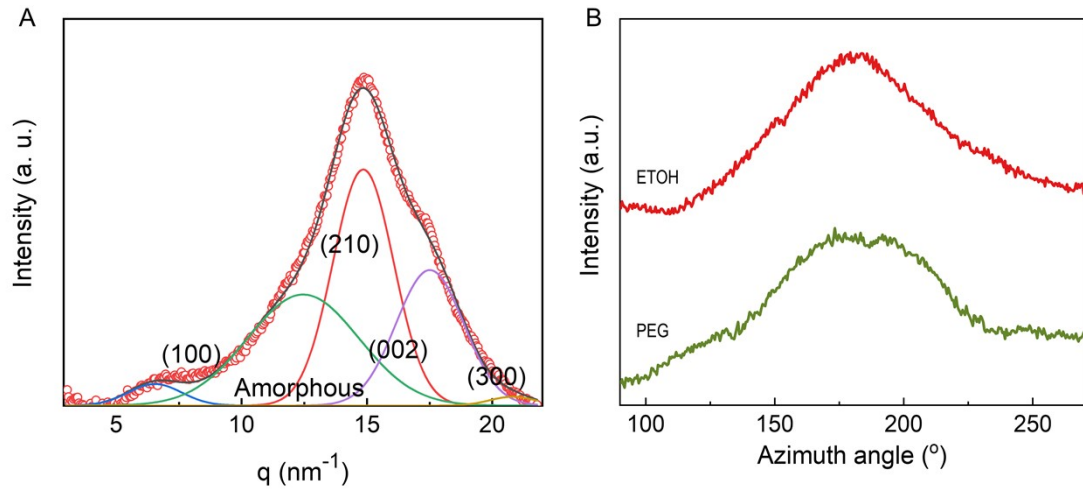

**Fig. S3.** Structure of MT-SFMs. (A) Deconvolution result of WAXS pattern of ET-MT-SFMs. (B) The measured scattering intensity vs. Azimuthal angle curves of the WAXS pattern of MT-SFMs at  $14.8 \text{ nm}^{-1}$  (shown in Figure 5D and 5E).

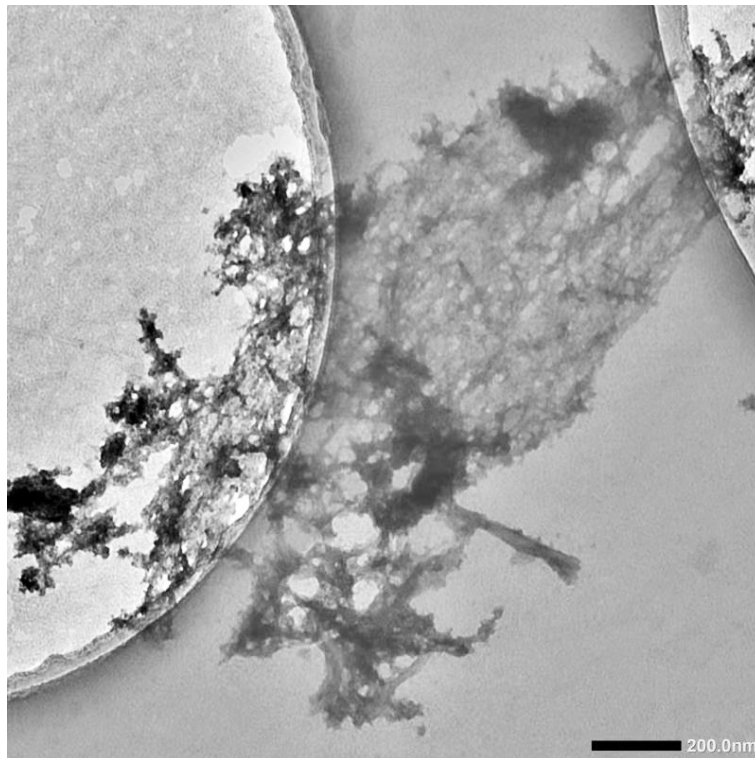

**Fig. S4.** Transmission electron microscopy image of silk protein solution

**Table S1. The number of molecules for several polyAG solution with ethanol coagulation bath.**

| Ethanol coagulation bath                 | 6-polyAG | 9-polyAG | 12-polyAG | 15-polyAG |
|------------------------------------------|----------|----------|-----------|-----------|
| No. of polyAG                            | 6        | 9        | 12        | 15        |
| No. of Ca <sup>2+</sup> /Cl <sup>-</sup> | 15/30    | 23/46    | 30/60     | 38/76     |
| No. of ethanol                           | 351      | 832      | 832       | 1625      |
| No. of water                             | 960      | 1744     | 2051      | 3147      |

**Table S2. The number of molecules for several polyAG solution with PEG coagulation bath.**

| PEG coagulation bath                     | 6-polyAG | 9-polyAG | 12-polyAG | 15-polyAG |
|------------------------------------------|----------|----------|-----------|-----------|
| No. of polyAG                            | 6        | 9        | 12        | 15        |
| No. of Ca <sup>2+</sup> /Cl <sup>-</sup> | 15/30    | 23/46    | 30/60     | 38/76     |
| No. of PEG                               | 1        | 2        | 2         | 3         |
| No. of water                             | 1053     | 1800     | 2107      | 2854      |

**Table S3. The mechanical properties of WS-SFFs.**

|                  | Strength (MPa) | Modulus (GPa) |
|------------------|----------------|---------------|
| PEG-WS-SFFs-0.5x | 40.5±7.7       | 5.4±1.3       |
| PEG-WS-SFFs-1x   | 57.5±10.2      | 6.1±1.1       |
| ET-WS-SFFs-0.5x  | 32.9±3.6       | 4.6±0.7       |
| ET-WS-SFFs-1x    | 40.6±6.0       | 5.1±0.5       |

**Table S4. The mechanical properties of MT-SFMs and their control samples in dry state.**

|              | Strength (MPa) | Modulus (GPa) |
|--------------|----------------|---------------|
| PEG-MT-SFMs  | 60±4           | 2.9±0.4       |
| ET-MT-SFMs   | 59±7           | 2.6±0.7       |
| PEG-SFMs     | 37±3           | 1.4±0.4       |
| ET-SFMs      | 35±4           | 1.3±0.3       |
| As-cast SFMs | 20±3           | 1.0±0.2       |

**Table S5. The mechanical properties of MT-SFMs and their control samples in wet state.**

|              | Strength (MPa) | Modulus (MPa) |
|--------------|----------------|---------------|
| PEG-MT-SFMs  | 5.4±0.5        | 23.8±1.5      |
| ET-MT-SFMs   | 4.7±0.9        | 21.3±2.1      |
| PEG-SFMs     | 2.2±0.1        | 5.9±0.6       |
| ET-SFMs      | 1.9±0.4        | 4.9±2.2       |
| As-cast SFMs | 0.6±0.2        | 1.7±0.7       |
